# Supplementary material for: Effects of fullerene C 60 on the uptake of nitrogen and mineral elements in crops using synchrotron radiation micro-X-ray fluorescence spectrometry (SR-μXRF) and stable isotope labelling
Source: Royal Society of Chemistry journal article supplement (doi:10.1039/d4en00310a), 2024-09-30
Supplement: d4en00310a1.pdf [file d4en00310a1.pdf]

## Electronic supplementary information

**C<sub>60</sub> treatment.** C<sub>60</sub> (500 mg) was mixed with 50 g of air-dried soils and placed in a 50-mL large plastic centrifuge tube. The concentration of C<sub>60</sub> was 10.0 mg/g. Soils without C<sub>60</sub> was used as the control. The seeds of maize, wheat, and soybean were germinated. Healthy seedlings were selected and planted in centrifuge tubes, with buds facing up and roots facing down, 4 replicates per group (a total of 48 tubes). Seedlings were irrigated with water at soil water holding capacity of 70% and grown under a photoperiod of 12 h light/12 h dark at 25/20 °C day/night and 80% humidity for 10 days.

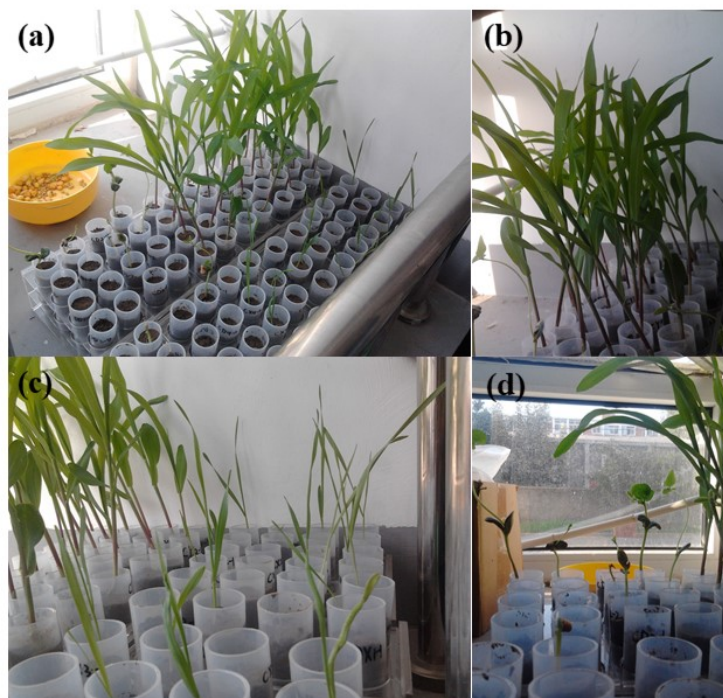

Figure S1 (a) Growth of maize, wheat and soybean plants in centrifuge tubes with four replicates per group (48 tubes in total)  
(b) Growth of maize (c) Growth of wheat (d) Growth of soybean.

**Table 1:** Dry weight and <sup>15</sup>N uptake rate of maize

|                                               | Dry weight (g)   |             |             | <sup>15</sup> N-uptake rate (µg N g <sup>-1</sup> d.w.tissue h <sup>-1</sup> ) |             |             |
|-----------------------------------------------|------------------|-------------|-------------|--------------------------------------------------------------------------------|-------------|-------------|
|                                               | Underground<br>d | Aboveground | Whole plant | Underground<br>d                                                               | Aboveground | Whole plant |
| Ctrl-NH <sub>4</sub> <sup>+</sup>             | 0.2349           | 0.3640      | 0.5989      | 32.9347                                                                        | 3.3291      | 36.2637     |
| C <sub>60</sub> -NH <sub>4</sub> <sup>+</sup> | 0.0981           | 0.3171      | 0.4151      | 34.4866                                                                        | 2.9212      | 37.4078     |
| Ctrl-NO <sub>3</sub> <sup>-</sup>             | 0.1507           | 0.3085      | 0.4593      | 55.3715                                                                        | 23.3417     | 78.7131     |
| C <sub>60</sub> -NO <sub>3</sub> <sup>-</sup> | 0.1586           | 0.4491      | 0.6077      | 29.6327                                                                        | 7.8550      | 37.4877     |
| Ctrl-H <sub>2</sub> O                         | 0.1362           | 0.2562      | 0.3923      | --                                                                             | --          | --          |
| C <sub>60</sub> -H <sub>2</sub> O             | 0.0625           | 0.1896      | 0.2520      | --                                                                             | --          | --          |

**Table 2:** Dry weight and <sup>15</sup>N uptake rate of wheat

|                                               | Dry weight (g) |             |             | <sup>15</sup> N-uptake rate (μg N g <sup>-1</sup> d.w.tissue h <sup>-1</sup> ) |             |             |
|-----------------------------------------------|----------------|-------------|-------------|--------------------------------------------------------------------------------|-------------|-------------|
|                                               | Underground    | Aboveground | Whole plant | Underground                                                                    | Aboveground | Whole plant |
|                                               | d              |             |             | d                                                                              |             |             |
| Ctrl-NH <sub>4</sub> <sup>+</sup>             | 0.0308         | 0.1167      | 0.1475      | 6.1249                                                                         | 6.2669      | 12.3918     |
| C <sub>60</sub> -NH <sub>4</sub> <sup>+</sup> | 0.0264         | 0.0843      | 0.1107      | 14.6525                                                                        | 36.271      | 50.9236     |
| Ctrl-NO <sub>3</sub> <sup>-</sup>             | 0.0349         | 0.0973      | 0.1322      | 7.0437                                                                         | 24.9021     | 31.9457     |
| C <sub>60</sub> -NO <sub>3</sub> <sup>-</sup> | 0.0254         | 0.0989      | 0.1243      | 7.4774                                                                         | 22.7378     | 30.2152     |
| Ctrl-H <sub>2</sub> O                         | 0.0361         | 0.1147      | 0.1508      | --                                                                             | --          | --          |
| C <sub>60</sub> -H <sub>2</sub> O             | 0.0340         | 0.1279      | 0.1620      | --                                                                             | --          | --          |

**Table 3:** Dry weight and <sup>15</sup>N uptake rate of soybean

|                                               | Dry weight (g) |             |             | <sup>15</sup> N-uptake rate (μg N g <sup>-1</sup> d.w.tissue h <sup>-1</sup> ) |             |             |
|-----------------------------------------------|----------------|-------------|-------------|--------------------------------------------------------------------------------|-------------|-------------|
|                                               | Underground    | Aboveground | Whole plant | Underground                                                                    | Aboveground | Whole plant |
|                                               | d              |             |             | d                                                                              |             |             |
| Ctrl-NH <sub>4</sub> <sup>+</sup>             | 0.0097         | 0.1469      | 0.1566      | 148.78017                                                                      | 1.63015     | 150.41032   |
| C <sub>60</sub> -NH <sub>4</sub> <sup>+</sup> | 0.0352         | 0.22915     | 0.26435     | 125.10295                                                                      | 6.96548     | 132.06844   |
| Ctrl-NO <sub>3</sub> <sup>-</sup>             | 0.03057        | 0.147       | 0.17757     | 47.61186                                                                       | 23.57775    | 71.18961    |
| C <sub>60</sub> -NO <sub>3</sub> <sup>-</sup> | 0.04233        | 0.29437     | 0.3367      | 11.64568                                                                       | 12.48156    | 24.12724    |
| Ctrl-H <sub>2</sub> O                         | 0.03545        | 0.31115     | 0.3466      | --                                                                             | --          | --          |
| C <sub>60</sub> -H <sub>2</sub> O             | 0.0092         | 0.1256      | 0.1348      | --                                                                             | --          | --          |

**Table 4:** Comparison of mineral elements in maize (Data are normalized)

|    | Underground             |                         | Aboveground             |                         |
|----|-------------------------|-------------------------|-------------------------|-------------------------|
|    | Ctrl-maize              | C <sub>60</sub> -maize  | Ctrl-maize              | C <sub>60</sub> -maize  |
| Ar | 5.8333×10 <sup>-4</sup> | 5.7981×10 <sup>-4</sup> | 8.3409×10 <sup>-4</sup> | 8.1207×10 <sup>-4</sup> |
| K  | 0.0087                  | 0.0111                  | 0.0391                  | 0.0350                  |
| Ca | 0.0343                  | 0.0374                  | 0.0259                  | 0.0279                  |
| Ti | 0.0060                  | 0.0069                  | 1.2762×10 <sup>-4</sup> | 2.0708×10 <sup>-4</sup> |
| Cr | 4.8612×10 <sup>-4</sup> | 3.9609×10 <sup>-4</sup> | 2.2599×10 <sup>-5</sup> | 7.0823×10 <sup>-5</sup> |
| Mn | 0.0092                  | 0.0095                  | 0.0039                  | 0.0035                  |
| Fe | 0.6679                  | 0.6676                  | 0.0093                  | 0.0364                  |
| Ni | 0.0014                  | 0.0015                  | 4.6416×10 <sup>-5</sup> | 9.9477×10 <sup>-5</sup> |
| Cu | 0.0027                  | 0.0028                  | 0.0016                  | 0.0013                  |
| Zn | 0.0078                  | 0.0086                  | 0.0101                  | 0.0097                  |
| Ga | 5.3176×10 <sup>-4</sup> | 5.375×10 <sup>-4</sup>  | 5.9597×10 <sup>-5</sup> | 6.1938×10 <sup>-5</sup> |
| As | 0.0020                  | 0.0024                  | 0.0010                  | 9.8641×10 <sup>-4</sup> |
| Se | 8.8232×10 <sup>-4</sup> | 0.0011                  | 0.0015                  | 0.0015                  |
| Br | 0.0029                  | 0.0039                  | 0.0034                  | 0.0031                  |
| Kr | 0.0022                  | 0.0042                  | 0.0032                  | 0.0030                  |

**Table 5:** Comparison of mineral elements in wheat (Data are normalized)

|  | Underground |                        | Aboveground |                        |
|--|-------------|------------------------|-------------|------------------------|
|  | Ctrl-maize  | C <sub>60</sub> -maize | Ctrl-maize  | C <sub>60</sub> -maize |

|    |                         |                         |                         |                         |
|----|-------------------------|-------------------------|-------------------------|-------------------------|
| Ar | 2.7813×10 <sup>-4</sup> | 2.9637×10 <sup>-4</sup> | 9.4970×10 <sup>-4</sup> | 0.0010                  |
| K  | 0.0055                  | 0.0062                  | 0.0536                  | 0.0654                  |
| Ca | 0.0242                  | 0.0255                  | 0.0179                  | 0.0241                  |
| Ti | 0.0108                  | 0.0097                  | 2.6701×10 <sup>-4</sup> | 2.5836×10 <sup>-4</sup> |
| Cr | 2.5942×10 <sup>-4</sup> | 3.5364×10 <sup>-4</sup> | 2.3106×10 <sup>-5</sup> | 2.0490×10 <sup>-6</sup> |
| Mn | 0.00493                 | 0.0048                  | 0.0031                  | 0.0038                  |
| Fe | 1.14133                 | 0.9907                  | 0.0356                  | 0.0406                  |
| Ni | 4.5408×10 <sup>-4</sup> | 4.2346×10 <sup>-4</sup> | 3.384×10 <sup>-5</sup>  | 7.1163×10 <sup>-5</sup> |
| Cu | 0.0023                  | 0.0022                  | 0.0018                  | 0.0020                  |
| Zn | 0.0099                  | 0.0104                  | 0.0102                  | 0.0131                  |
| Ga | 0.0041                  | 4.9933×10 <sup>-4</sup> | 5.6406×10 <sup>-5</sup> | 2.7647×10 <sup>-5</sup> |
| As | 0.0013                  | 0.0010                  | 9.8757×10 <sup>-4</sup> | 0.0011                  |
| Se | 4.9633×10 <sup>-4</sup> | 3.2993×10 <sup>-4</sup> | 0.0014                  | 0.0015                  |
| Br | 0.00141                 | 0.0019                  | 0.0035                  | 0.0041                  |
| Kr | 0.0093                  | 0.0073                  | 0.0026                  | 0.0032                  |

**Table 6:** Comparison of mineral elements in soybean (Data are normalized)

|    | Underground             |                         | Aboveground             |                         |
|----|-------------------------|-------------------------|-------------------------|-------------------------|
|    | Ctrl-maize              | C <sub>60</sub> -maize  | Ctrl-maize              | C <sub>60</sub> -maize  |
| Ar | 5.6910×10 <sup>-4</sup> | 4.6907×10 <sup>-4</sup> | 2.2737×10 <sup>-4</sup> | 2.4220×10 <sup>-4</sup> |
| K  | 0.0103                  | 0.0100                  | 0.0273                  | 0.0279                  |
| Ca | 0.0343                  | 0.04178                 | 0.05734                 | 0.04657                 |
| Ti | 0.0082                  | 0.0082                  | 1.2662×10 <sup>-4</sup> | 1.0831×10 <sup>-4</sup> |
| Cr | 6.4057×10 <sup>-4</sup> | 5.0841×10 <sup>-4</sup> | 3.3030×10 <sup>-5</sup> | 1.9539×10 <sup>-5</sup> |
| Mn | 0.0098                  | 0.0077                  | 7.2204×10 <sup>-4</sup> | 0.0019                  |
| Fe | 0.8712                  | 0.8573                  | 0.0274                  | 0.0369                  |
| Ni | 0.0012                  | 0.0011                  | 3.9698×10 <sup>-4</sup> | 3.3757×10 <sup>-4</sup> |
| Cu | 0.0024                  | 0.0019                  | 0.0018                  | 0.0018                  |
| Zn | 0.0067                  | 0.0067                  | 0.0087                  | 0.0098                  |
| Ga | 4.4415×10 <sup>-4</sup> | 5.1082×10 <sup>-4</sup> | 9.0237×10 <sup>-5</sup> | 7.327×10 <sup>-5</sup>  |
| As | 0.0016                  | 0.00167                 | 0.0011                  | 0.0011                  |
| Se | 7.5629×10 <sup>-4</sup> | 6.9863×10 <sup>-4</sup> | 0.0014                  | 0.0016                  |
| Br | 0.0023                  | 0.0021                  | 0.0021                  | 9.8081×10 <sup>-4</sup> |
| Kr | 0.0034                  | 0.0084                  | 0.0206                  | 0.0124                  |
